# Supplementary material for: Synergistic Integration of Mesenchymal Stem Cells and Hydrostatic Pressure in the Expansion and Maintenance of Human Hematopoietic/Progenitor Cells
Source: Hindawi journal article supplement (doi:10.1155/2018/4527929), 2018-01-01
Supplement: f1 [file 4527929.f1.pdf]

## Supplementary Tables

**Supplementary Table S1. Primers used for quantitative real-time polymerase chain reaction**

| Marker                                     |    | Sequence (5'→3')          | Accession No.  |
|--------------------------------------------|----|---------------------------|----------------|
| Angiopoietin 1, ANGPT1                     | A  | CCCTCCGGTGAATATTGGCTGG    | NM_001146.3    |
|                                            | AS | CTCGGTTCCCTTCCCAGTCCATTA  |                |
| Angiopoietin 2, ANGPT2                     | A  | AAATAAGCAGCATCAGCCAACCAGG | NM_001147.2    |
|                                            | AS | CACATGCATCAAACCACCAGCCTC  |                |
| Jagged 1, JAG1                             | A  | CATCGGGGGCAACACCTTCAA     | NM_000214.2    |
|                                            | AS | AATCCCACGCCTCCACAAGCA     |                |
| Osteopontin, OPN                           | A  | GGAAAGCGAGGAGTTGAATGGTGC  | NM_000582.2    |
|                                            | AS | GGACTGCTTGTGGCTGTGGGTTTC  |                |
| Runt-related transcription factor 2, RUNX2 | A  | TGAGATTGTGGGCCGGAGTGG     | NM_001024630.3 |
|                                            | AS | TCTGTGCCTTCTGGGTTCCCGA    |                |
| Stromal cell-derived factor 1, SDF1        | A  | CCCGGATTGCTGCTCAGATTGG    | NM_199168.3    |
|                                            | AS | GGCTCAGGGTCAGCGTGGAATT    |                |
| Thrombopoietin, TPO                        | A  | TGATGGCAGCACGGGGACAA      | NM_000460.3    |
|                                            | AS | AGGCTCTGCAGGGCCCAAG       |                |
| Vascular cell adhesion molecule 1, VCAM1   | A  | GACCCCGGATTGCTGCTCAGATT   | NM_001078.3    |
|                                            | AS | CTCAGGGTCAGCGTGGAATTGG    |                |
| Beta-actin, B-actin                        | A  | GAGCGGGAAATCGTGCGTGAC     | NM_001101.3    |
|                                            | AS | GGAACCGCTCATTGCCAATGG     |                |

**Supplementary Table S2. Genes evaluated in the quantitative PCR array**

| <b>Position</b> | <b>Accession No.</b> | <b>Symbol</b> | <b>Description</b>                                  |
|-----------------|----------------------|---------------|-----------------------------------------------------|
| A1              | NM_001146            | ANGPT1        | Angiopoietin 1                                      |
| A2              | NM_000038            | APC           | Adenomatous polyposis coli                          |
| A3              | NM_004674            | ASH2L         | Ash2 (absent, small, or homeotic)-like (Drosophila) |
| A4              | NM_013314            | BLNK          | B-cell linker                                       |
| A5              | NM_001755            | CBFB          | Core-binding factor, beta subunit                   |
| A6              | NM_001295            | CCR1          | Chemokine (C-C motif) receptor 1                    |
| A7              | NM_000591            | CD14          | CD14 molecule                                       |
| A8              | NM_001770            | CD19          | CD19 molecule                                       |
| A9              | NM_006016            | CD164         | CD164 molecule, sialomucin                          |
| A10             | NM_001766            | CD1D          | CD1d molecule                                       |
| A11             | NM_001767            | CD2           | CD2 molecule                                        |
| A12             | NM_001242            | CD27          | CD27 molecule                                       |
| B1              | NM_001773            | CD34          | CD34 molecule                                       |
| B2              | NM_001775            | CD38          | CD38 molecule                                       |
| B3              | NM_000732            | CD3D          | CD3d molecule, delta (CD3-TCR complex)              |
| B4              | NM_000073            | CD3G          | CD3g molecule, gamma (CD3-TCR complex)              |
| B5              | NM_000616            | CD4           | CD4 molecule                                        |
| B6              | NM_000610            | CD44          | CD44 molecule (Indian blood group)                  |
| B7              | NM_203330            | CD59          | CD59 molecule, complement regulatory protein        |
| B8              | NM_005191            | CD80          | CD80 molecule                                       |
| B9              | NM_006889            | CD86          | CD86 molecule                                       |
| B10             | NM_001768            | CD8A          | CD8a molecule                                       |
| B11             | NM_001805            | CEBPE         | CCAAT/enhancer binding protein (C/EBP), epsilon     |
| B12             | NM_001806            | CEBPG         | CCAAT/enhancer binding protein (C/EBP), gamma       |

|     |              |        |                                                                                                           |
|-----|--------------|--------|-----------------------------------------------------------------------------------------------------------|
| C1  | NM_015892    | CHST15 | Carbohydrate (N-acetylgalactosamine 4-sulfate 6-O) sulfotransferase 15                                    |
| C2  | NM_000757    | CSF1   | Colony stimulating factor 1 (macrophage)                                                                  |
| C3  | NM_000758    | CSF2   | Colony stimulating factor 2 (granulocyte-macrophage)                                                      |
| C4  | NM_003467    | CXCR4  | Chemokine (C-X-C motif) receptor 4                                                                        |
| C5  | NM_005618    | DLL1   | Delta-like 1 (Drosophila)                                                                                 |
| C6  | NM_000118    | ENG    | Endoglin (Osler-Rendu-Weber syndrome 1)                                                                   |
| C7  | NM_000799    | EPO    | Erythropoietin                                                                                            |
| C8  | NM_005238    | ETS1   | V-ets erythroblastosis virus E26 oncogene homolog 1 (avian)                                               |
| C9  | NM_001987    | ETV6   | Ets variant 6                                                                                             |
| C10 | NM_001459    | FLT3LG | Fms-related tyrosine kinase 3 ligand                                                                      |
| C11 | NM_002049    | GATA1  | GATA binding protein 1 (globin transcription factor 1)                                                    |
| C12 | NM_032638    | GATA2  | GATA binding protein 2                                                                                    |
| D1  | NM_006037    | HDAC4  | Histone deacetylase 4                                                                                     |
| D2  | NM_005474    | HDAC5  | Histone deacetylase 5                                                                                     |
| D3  | NM_001098416 | HDAC7  | Histone deacetylase 7                                                                                     |
| D4  | NM_178425    | HDAC9  | Histone deacetylase 9                                                                                     |
| D5  | NM_000572    | IL10   | Interleukin 10                                                                                            |
| D6  | NM_000641    | IL11   | Interleukin 11                                                                                            |
| D7  | NM_002187    | IL12B  | Interleukin 12B (natural killer cell stimulatory factor 2, cytotoxic lymphocyte maturation factor 2, p40) |
| D8  | NM_000575    | IL1A   | Interleukin 1, alpha                                                                                      |
| D9  | NM_000586    | IL2    | Interleukin 2                                                                                             |

|     |           |        |                                                                                        |
|-----|-----------|--------|----------------------------------------------------------------------------------------|
| D10 | NM_018724 | IL20   | Interleukin 20                                                                         |
| D11 | NM_002184 | IL6ST  | Interleukin 6 signal transducer                                                        |
| D12 | NM_002191 | INHA   | Inhibin, alpha                                                                         |
| E1  | NM_002192 | INHBA  | Inhibin, beta A                                                                        |
| E2  | NM_000210 | ITGA6  | Integrin, alpha 6                                                                      |
| E3  | NM_000214 | JAG1   | Jagged 1                                                                               |
| E4  | NM_002226 | JAG2   | Jagged 2                                                                               |
| E5  | NM_002253 | KDR    | Kinase insert domain receptor (a type III receptor tyrosine kinase)                    |
| E6  | NM_003994 | KITLG  | KIT ligand                                                                             |
| E7  | NM_005574 | LMO2   | LIM domain only 2 (rhombotin-like 1)                                                   |
| E8  | NM_006152 | LRMP   | Lymphoid-restricted membrane protein                                                   |
| E9  | NM_002371 | MAL    | Mal, T-cell differentiation protein                                                    |
| E10 | NM_007181 | MAP4K1 | Mitogen-activated protein kinase kinase kinase kinase 1                                |
| E11 | NM_004994 | MMP9   | Matrix metalloproteinase 9 (gelatinase B, 92kDa gelatinase, 92kDa type IV collagenase) |
| E12 | NM_014071 | NCOA6  | Nuclear receptor coactivator 6                                                         |
| F1  | NM_000625 | NOS2   | Nitric oxide synthase 2, inducible                                                     |
| F2  | NM_017617 | NOTCH1 | Notch 1                                                                                |
| F3  | NM_024408 | NOTCH2 | Notch 2                                                                                |
| F4  | NM_004557 | NOTCH4 | Notch 4                                                                                |
| F5  | NM_000442 | PECAM1 | Platelet/endothelial cell adhesion molecule                                            |
| F6  | NM_006017 | PROM1  | Prominin 1                                                                             |
| F7  | NM_002838 | PTPRC  | Protein tyrosine phosphatase, receptor type, C                                         |

|     |           |         |                                                                                  |
|-----|-----------|---------|----------------------------------------------------------------------------------|
| F8  | NM_005349 | RBPJ    | Recombination signal binding protein for immunoglobulin kappa J region           |
| F9  | NM_001754 | RUNX1   | Runt-related transcription factor 1                                              |
| F10 | NM_022754 | SFXN1   | Sideroflexin 1                                                                   |
| F11 | NM_144949 | SOCS5   | Suppressor of cytokine signaling 5                                               |
| F12 | NM_000582 | SPP1    | Secreted phosphoprotein 1                                                        |
| G1  | NM_007315 | STAT1   | Signal transducer and activator of transcription 1, 91 kDa                       |
| G2  | NM_003150 | STAT3   | Signal transducer and activator of transcription 3 (acute-phase response factor) |
| G3  | NM_020860 | STIM2   | Stromal interaction molecule 2                                                   |
| G4  | NM_003189 | TAL1    | T-cell acute lymphocytic leukemia 1                                              |
| G5  | NM_000459 | TEK     | TEK tyrosine kinase, endothelial                                                 |
| G6  | NM_003265 | TLR3    | Toll-like receptor 3                                                             |
| G7  | NM_138554 | TLR4    | Toll-like receptor 4                                                             |
| G8  | NM_006288 | THY1    | Thy-1 cell surface antigen                                                       |
| G9  | NM_003701 | TNFSF11 | Tumor necrosis factor (ligand) superfamily, member 11                            |
| G10 | NM_006778 | TRIM10  | Tripartite motif containing 10                                                   |
| G11 | NM_005428 | VAV1    | Vav 1 guanine nucleotide exchange factor                                         |
| G12 | NM_003376 | VEGFA   | Vascular endothelial growth factor A                                             |
| H1  | NM_000190 | HMBS    | Hydroxymethylbilane synthase                                                     |
| H2  | NM_004048 | B2M     | Beta-2-microglobulin                                                             |
| H3  | NM_000194 | HPRT1   | Hypoxanthine phosphoribosyltransferase 1                                         |
| H4  | NM_002046 | GAPDH   | Glyceraldehyde-3-phosphate dehydrogenase                                         |
| H5  | NM_000291 | PGK1    | Phosphoglycerate kinase 1                                                        |
